# Supplementary material for: Antitumor Effect of Korean Red Ginseng through Blockade of PD-1/PD-L1 Interaction in a Humanized PD-L1 Knock-In MC38 Cancer Mouse Model
Source: MDPI journal article supplement (doi:10.3390/ijms24031894), 2023-01-18
Supplement: s1 [file s1]

## Supplementary materials

### *Cell viability assay*

Flow cytometry was performed to determine cell surface PD-L1 expression by 30-min incubation on ice with APC-anti-human PD-L1 (#393610, BioLegend, 1:200) and corresponding isotype control mAbs APC-anti Mouse IgG1 (#400122, BioLegend, 1:200). The cells were washed with PBS containing 2% BSA and 1mM EDTA and analysis with a Gallios flow cell counter (Beckman Coulter, Inc., Brea, CA, USA).

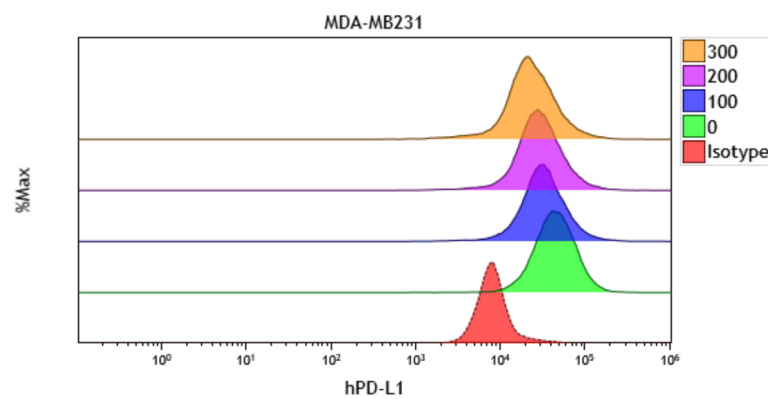

**Figure S1.** Effects of RGE on human PD-L1 expression by flow cytometry. MDA-MB231 cells ( $5 \times 10^5$  cells/ml) were treated with RGE at various concentrations (0–300  $\mu\text{g/mL}$ ) for 24 h and human PD-L1 expression was detected by flow cytometry.
